# Supplementary material
Source: PubMed Central journal article supplement (PMC3919521)

**SUPPLEMENTAL MATERIAL**

**Supplemental Table 1: Sensitivity analyses of multivariable-adjusted hazard ratios of CVD events for any CAC and CAC $\geq$ 100 by dyslipidemia category**

|                                | <b>Adding adjustment for initiation of dyslipidemia medication during follow-up to Model 3*</b> | <b>Including those on a dyslipidemia medication at baseline†</b> | <b>Excluding those initiating a dyslipidemia medication during follow-up‡</b> |
|--------------------------------|-------------------------------------------------------------------------------------------------|------------------------------------------------------------------|-------------------------------------------------------------------------------|
| <b>0 LA</b>                    | N=1,975                                                                                         | N=2,436                                                          | N=1,765                                                                       |
| <b>Any CAC</b>                 | 2.11 (1.17-3.79)<br>P=0.01                                                                      | 2.23 (1.35-3.70)<br>P=0.002                                      | 1.67 (0.87-3.21)<br>P=0.13                                                    |
| <b>CAC<math>\geq</math>100</b> | 2.85 (1.50-5.44)<br>P=0.001                                                                     | 3.23 (1.87-5.57)<br>P<0.001                                      | 1.95 (0.93-4.11)<br>P=0.08                                                    |
| <b>1 LA</b>                    | N=2,021                                                                                         | N=2,423                                                          | N=1,520                                                                       |
| <b>Any CAC</b>                 | 3.86 (2.32-6.41)<br>P<0.001                                                                     | 3.99 (2.53-6.29)<br>P<0.001                                      | 4.49 (2.35-8.59)<br>P<0.001                                                   |
| <b>CAC<math>\geq</math>100</b> | 5.63 (3.22-9.87)<br>P<0.001                                                                     | 5.66 (3.45-9.28)<br>P<0.001                                      | 6.24 (3.01-12.91)<br>P<0.001                                                  |
| <b>2 LA</b>                    | N=1,208                                                                                         | N=1,468                                                          | N=862                                                                         |
| <b>Any CAC</b>                 | 1.91 (1.07-3.38)<br>P=0.03                                                                      | 2.29 (1.34-3.90)<br>P=0.002                                      | 2.34 (1.06-5.18)<br>P=0.04                                                    |

|                                |                             |                             |                             |
|--------------------------------|-----------------------------|-----------------------------|-----------------------------|
| <b>CAC<math>\geq</math>100</b> | 2.60 (1.39-4.85)<br>P=0.003 | 3.09 (1.73-5.50)<br>P<0.001 | 3.24 (1.32-7.93)<br>P=0.01  |
| <b>3 LA</b>                    | N=330                       | N=370                       | N=185                       |
| <b>Any CAC</b>                 | 2.36 (0.94-5.96)<br>P=0.07  | 2.19 (0.90-5.29)<br>P=0.08  | 2.70 (0.52-13.89)<br>P=0.24 |
| <b>CAC<math>\geq</math>100</b> | 3.34 (1.20-9.27)<br>P=0.02  | 3.17 (1.18-8.57)<br>P=0.02  | 3.35 (0.54-20.63)<br>P=0.19 |

\*Primary analysis study population included; model adjusted for age, gender, ethnicity, education, MESA site, hypertension, initiation of dyslipidemia medication during follow-up, diabetes mellitus, smoking, body mass index, and family history.

†Entire MESA population with lipid and event data included; model adjusted for age, gender, ethnicity, education, MESA site, hypertension, baseline use or follow-up initiation of dyslipidemia medication, diabetes mellitus, smoking, body mass index, and family history.

‡In addition to those on baseline dyslipidemia medications, those starting such medications during follow-up were excluded; model adjusted for age, gender, ethnicity, education, MESA site, hypertension, diabetes mellitus, smoking, body mass index, and family history.

LA = lipid abnormality; CVD = atherosclerotic cardiovascular disease; CAC = coronary artery calcium.

**Supplemental Table 2: Multivariable-adjusted hazard ratios of CVD events by increasing dyslipidemia burden across CAC categories**

|             | <b>CAC=0</b>                          | <b>CAC 1 to 99</b>                  | <b>CAC<math>\geq</math>100</b>      |
|-------------|---------------------------------------|-------------------------------------|-------------------------------------|
| <b>0 LA</b> | Reference Group<br>N=1,152            | Reference Group<br>N=438            | Reference Group<br>N=385            |
| <b>1 LA</b> | 1.14 (0.60-2.16)<br>P=0.69<br>N=1,099 | 1.77 (1.00-3.14)<br>P=0.05<br>N=511 | 1.50 (1.03-2.18)<br>P=0.04<br>N=411 |
| <b>2 LA</b> | 1.94 (0.97-3.86)<br>P=0.06<br>N=562   | 1.76 (0.94-3.31)<br>P=0.08<br>N=358 | 1.69 (1.12-2.56)<br>P=0.01<br>N=288 |
| <b>3 LA</b> | 2.75 (1.11-6.81)<br>P=0.03<br>N=164   | 2.76 (1.17-6.50)<br>P=0.02<br>N=95  | 2.16 (1.13-4.10)<br>P=0.02<br>N=71  |

Adjusted for age, gender, ethnicity, education, MESA site, hypertension, diabetes mellitus, smoking, body mass index, and family history.

LA = lipid abnormality; CVD = atherosclerotic cardiovascular disease; CAC = coronary artery calcium.

**Supplemental Figure 1: CVD events per 1,000 person-years by strata of CAC and dataset quartiles of (A) LDL-C, (B) non-HDL-C, or (C) LDL-P.** CVD = atherosclerotic cardiovascular disease; CAC = coronary artery calcium score; LDL-C = low-density lipoprotein cholesterol; non-HDL-C = non-high-density lipoprotein cholesterol; LDL-P = LDL particle concentration.

(A)

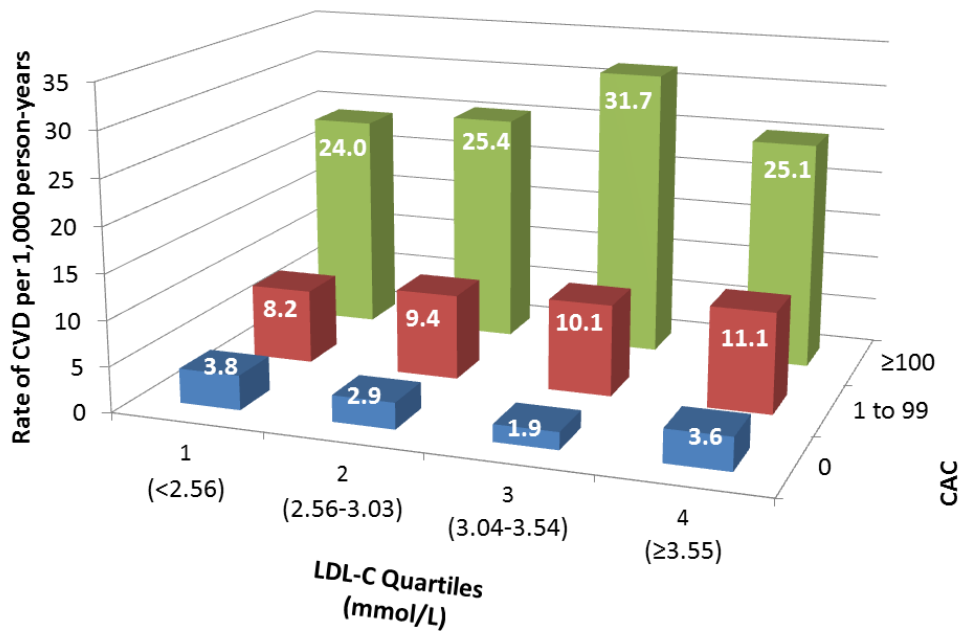

(B)

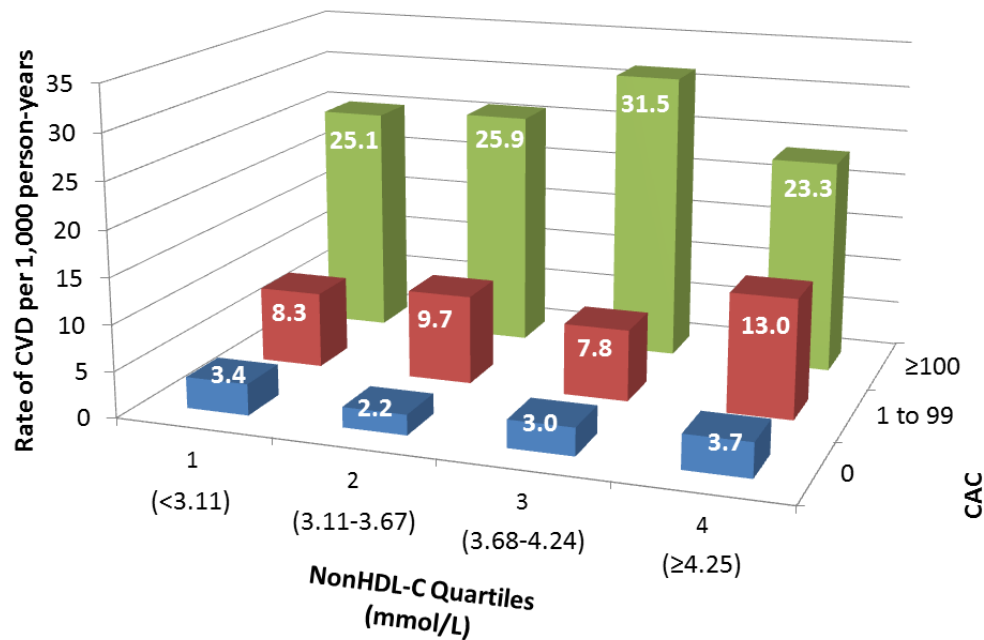

(C)

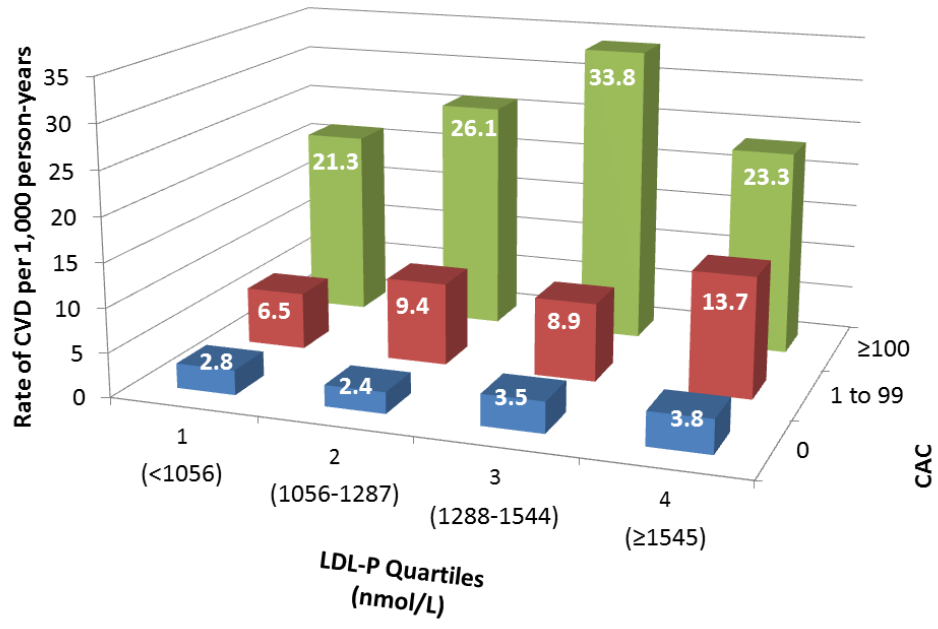

**Supplemental Figure 2: Cumulative incidence of CVD events by LA among participants with CAC=0.** LA = lipid abnormality; abbreviations otherwise per Supplemental Figure 1.

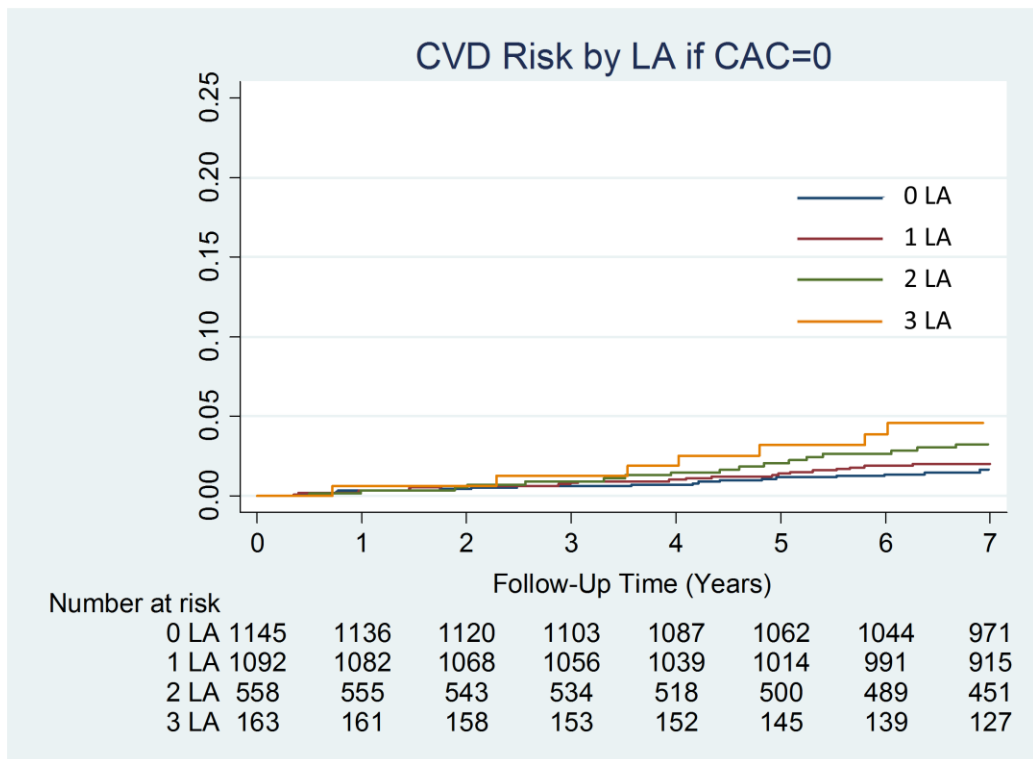

Supplement: NIHMS543042-supplement-Supplemental_Material.pdf [file NIHMS543042-supplement-Supplemental_Material.pdf]
